# Supplementary material for: Spherical octanuclear clusters in a Na–Ln–dipic system – encapsulation of a nitrate ion and incorporation of water nonamers and dodecamers
Source: Royal Society of Chemistry journal article supplement (doi:10.1039/c5ce00843c), 2015-01-01
Supplement: c5ce00843c1.pdf [file c5ce00843c1.pdf]

Supporting Information

Spherical Octanuclear Clusters in the Na-*Ln*-Dipic System –  
Encapsulation of Nitrate Ion and Incorporation of Water Nonamers and  
Dodecamers

S. M. Elahi and M. V. Rajasekharan\*

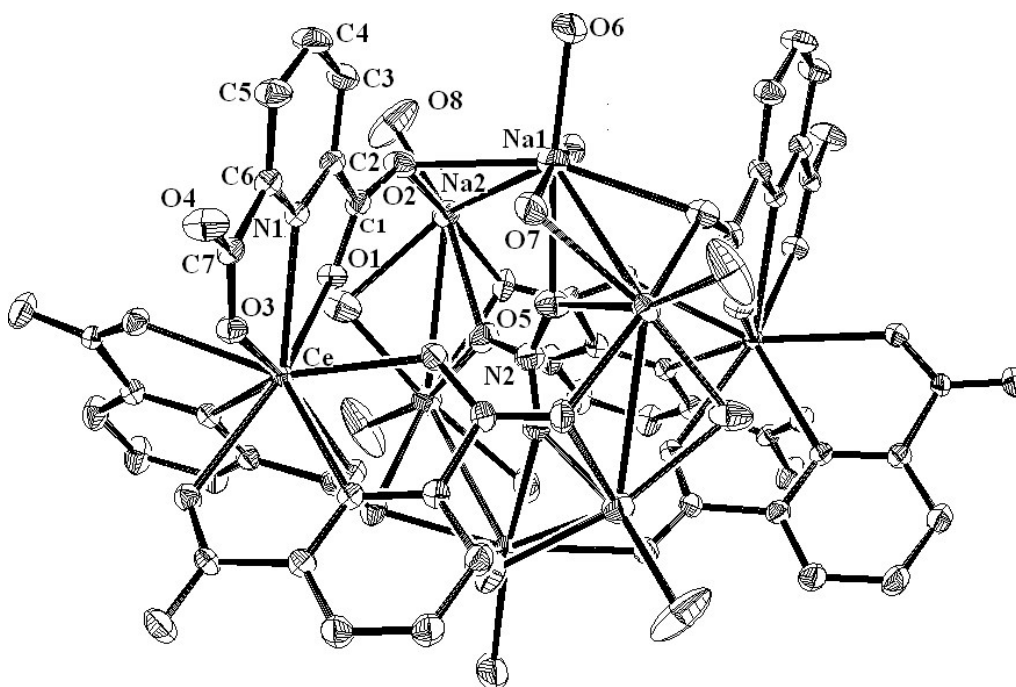

**Figure S1.** Ortep diagram of compound **1**, showing thermal ellipsoids at 50% probability. All lattice water molecules and hydrogen atoms were omitted for clarity.

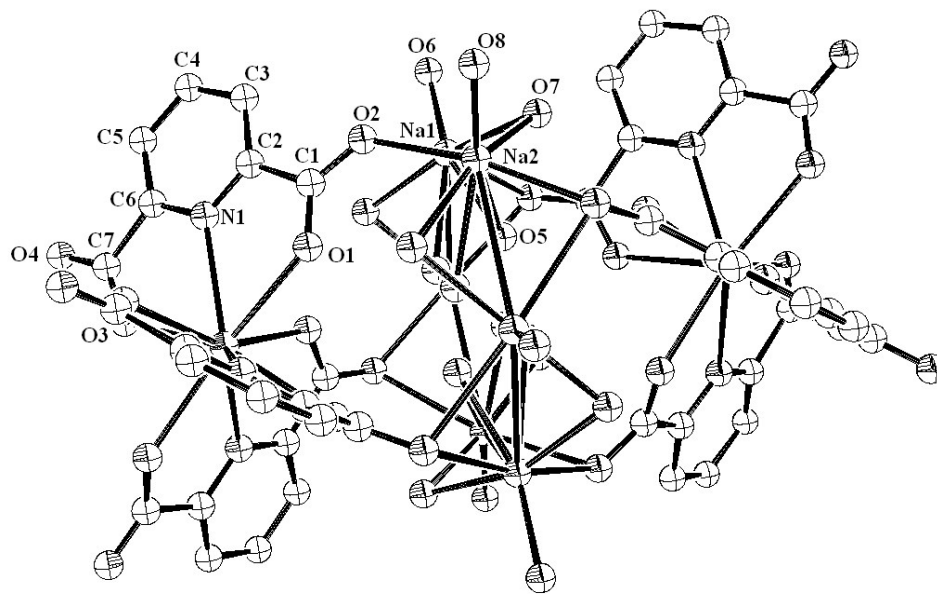

**Figure S2.** Ortep diagram of compound **4**, showing thermal ellipsoids at 50% probability. All lattice water molecules and hydrogen atoms were omitted for clarity.

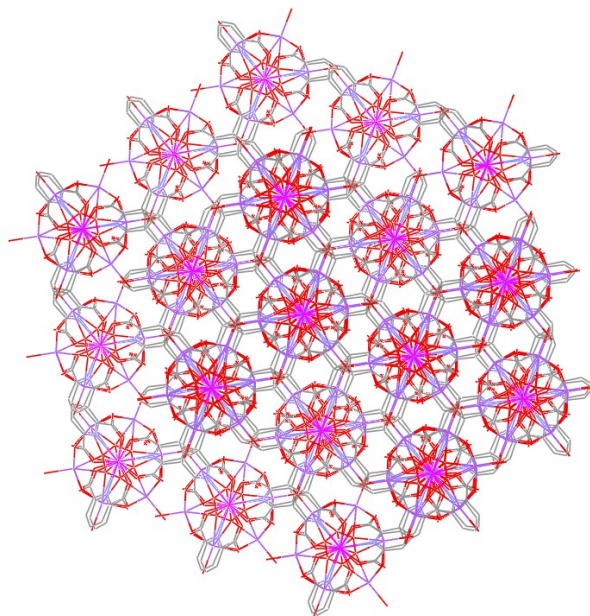

**Figure S3.** Packing through *c*-axis of compound **1**.

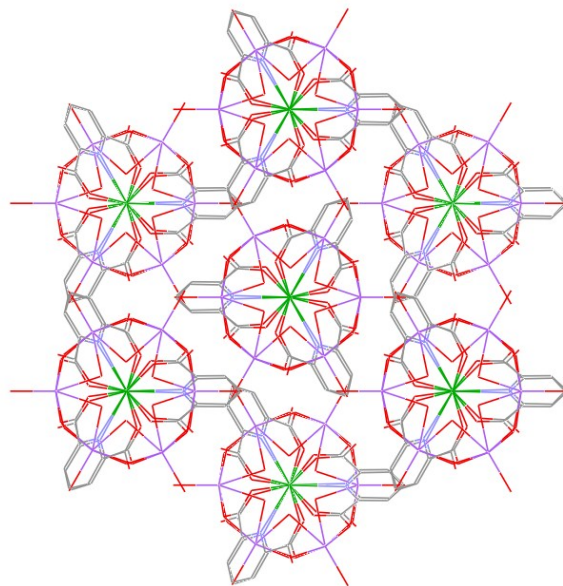

**Figure S4.** Packing through *c*-axis of compound **4**.

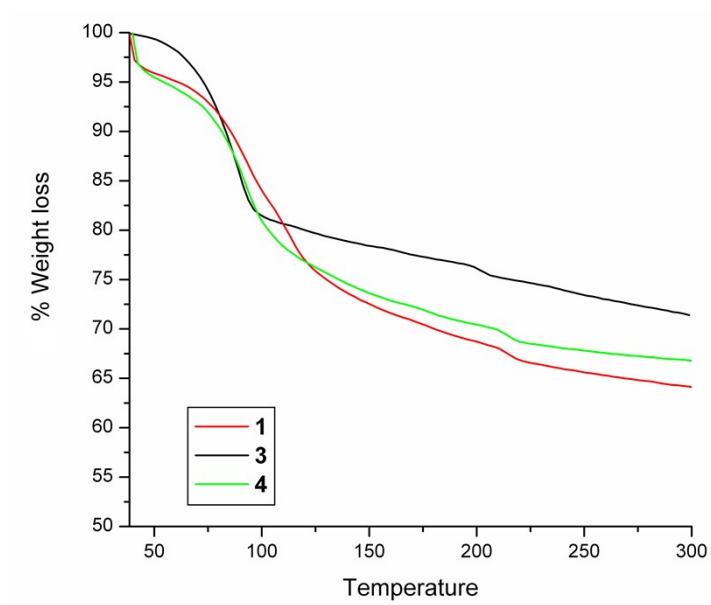

**Figure S5.** Thermogravimetric plots of compound **1**, **3** and **4**.
